# Supplementary material for: Effect of Amino Acids on Folates Accumulation in Wheat Seedlings during Germination under Red Light Radiation
Source: MDPI journal article supplement (doi:10.3390/molecules27206868), 2022-10-13
Supplement: s1 [file s1]

## Supplementary Materials

### Effect of Amino Acids on Folates Accumulation in Wheat Seedlings during Germination under Red Light Radiation

Chong Xie, Pei Wang, Jianwei Chang, Qiaoe Wang, Yongbin Han and Runqiang Yang\*

**Table S1.** Correlation between the production of folates with the gene expression of four enzymes.

|                  | <i>GTPCHI</i> | <i>ADCS</i> | <i>HPPK/DHPS</i> | <i>FPGS</i> |
|------------------|---------------|-------------|------------------|-------------|
| <i>ADCS</i>      | 0.61*         |             |                  |             |
| <i>HPPK/DHPS</i> | 0.45*         | −0.27       |                  |             |
| <i>FPGS</i>      | 0.63**        | 0.14        | 0.38             |             |
| Folates          | 0.80**        | 0.63**      | 0.29             | 0.62**      |

*GTPCHI*: guanosine triphosphate cyclohydrolase I, *ADCS*: aminodeoxychoris-mate synthase, *HPPK/DHPS*: 6-hydroxymethyldihydropterin pyrophosphoki-nase/dihydropteroate synthase, *FPGS*: folylpolyglutamate synthetase. \* $p < 0.05$ ; \*\* $p < 0.01$ .

**Table S2.** Parameters for determination of folates and precursors standards.

| Folate                 | Precursor ion ( <i>m/z</i> ) | Product ion ( <i>m/z</i> ) | DP (V) | EP(V) | CE (V) | CXP(V) |
|------------------------|------------------------------|----------------------------|--------|-------|--------|--------|
| THF                    | 446.2                        | 299.3                      | 80     | 10    | 25     | 10     |
|                        | 446.2                        | 166.3                      | 80     | 10    | 59     | 10     |
| 5-CH <sub>3</sub> -THF | 460.3                        | 313.2                      | 70     | 10    | 27     | 10     |
|                        | 460.3                        | 194.2                      | 60     | 10    | 47     | 10     |
| 5-CHO-THF              | 474.2                        | 299.3                      | 61     | 10    | 43     | 10     |
|                        | 474.2                        | 166.3                      | 120    | 10    | 54     | 10     |
| 10-CHO-FA              | 470.1                        | 295.3                      | 65     | 10    | 35     | 10     |
|                        | 470.1                        | 176.2                      | 86     | 10    | 59     | 10     |
| <i>p</i> ABA           | 138.0                        | 77.0                       | 80     | 10    | 30     | 10     |
|                        | 138.0                        | 94.0                       | 80     | 10    | 19     | 10     |
| Pterin                 | 194.0                        | 176.0                      | 60     | 10    | 23     | 10     |
|                        | 194.0                        | 106.0                      | 60     | 10    | 39     | 10     |

Note: DP: declustering potential; EP: entrance potential; CE: collision energy; CXP: collision cell exit potential; V: volt.

**Table S3.** Sequences of primers used in this study.

| Gene             | Primer name | Primer sequences(5'→3') | Gene Bank Access No. |
|------------------|-------------|-------------------------|----------------------|
| <i>GTPCHI</i>    | Sense       | GAGGACCCCCTAAGGAAAGA    | EF095153.1           |
|                  | Ant-sense   | CTGGGCACAAAATGGCAA      |                      |
| <i>ADCS</i>      | Sense       | ATGCTTGCAGAGAGAAACAGC   | EF208804.1           |
|                  | Ant-sense   | CCGCCCTTACCACCCATAAA    |                      |
| <i>HPPK/DHPS</i> | Sense       | TCTTGGAAGCAATGTGGGGG    | EF208803.1           |
|                  | Ant-sense   | GGCTGGTCGGTCACATACTC    |                      |
| <i>FPGS</i>      | Sense       | CCAAGCAGTGTGGGAGAAAT    | EF208805.1           |
|                  | Ant-sense   | GGGAGCCAGTAACAAGGACC    |                      |
